Articles of interest in other COB journals

From *Journal of Cell Science*

**Regulation of Rap1 activity is required for differential adhesion, cell-type patterning and morphogenesis in *Dictyostelium***

Katie Parkinson, Parvin Bolourani, David Traynor, Nicola L. Aldren, Robert R. Kay, Gerald Weeks and Christopher R. L. Thompson

Parkinson, K. et al. 2009. *J. Cell Sci.* doi:10.1242/jcs.036822

**Combinatorial probabilistic chromatin interactions produce transcriptional heterogeneity**

Ty C. Voss, R. Louis Schiltz, Myong-Hee Sung, Thomas A. Johnson, Sam John and Gordon L. Hager

Voss, T. C. et al. 2009. *J. Cell Sci.* doi:10.1242/jcs.035865
